# Supplementary material for: Optic neuropathy secondary to granulomatosis with polyangiitis in a patient with Graves’ disease: a case report
Source: Springer Nature journal article supplement (doi:10.1186/s13256-021-03207-4), 2021-12-01
Supplement: MOESM1 [file 19977606]

Supplemental Figure

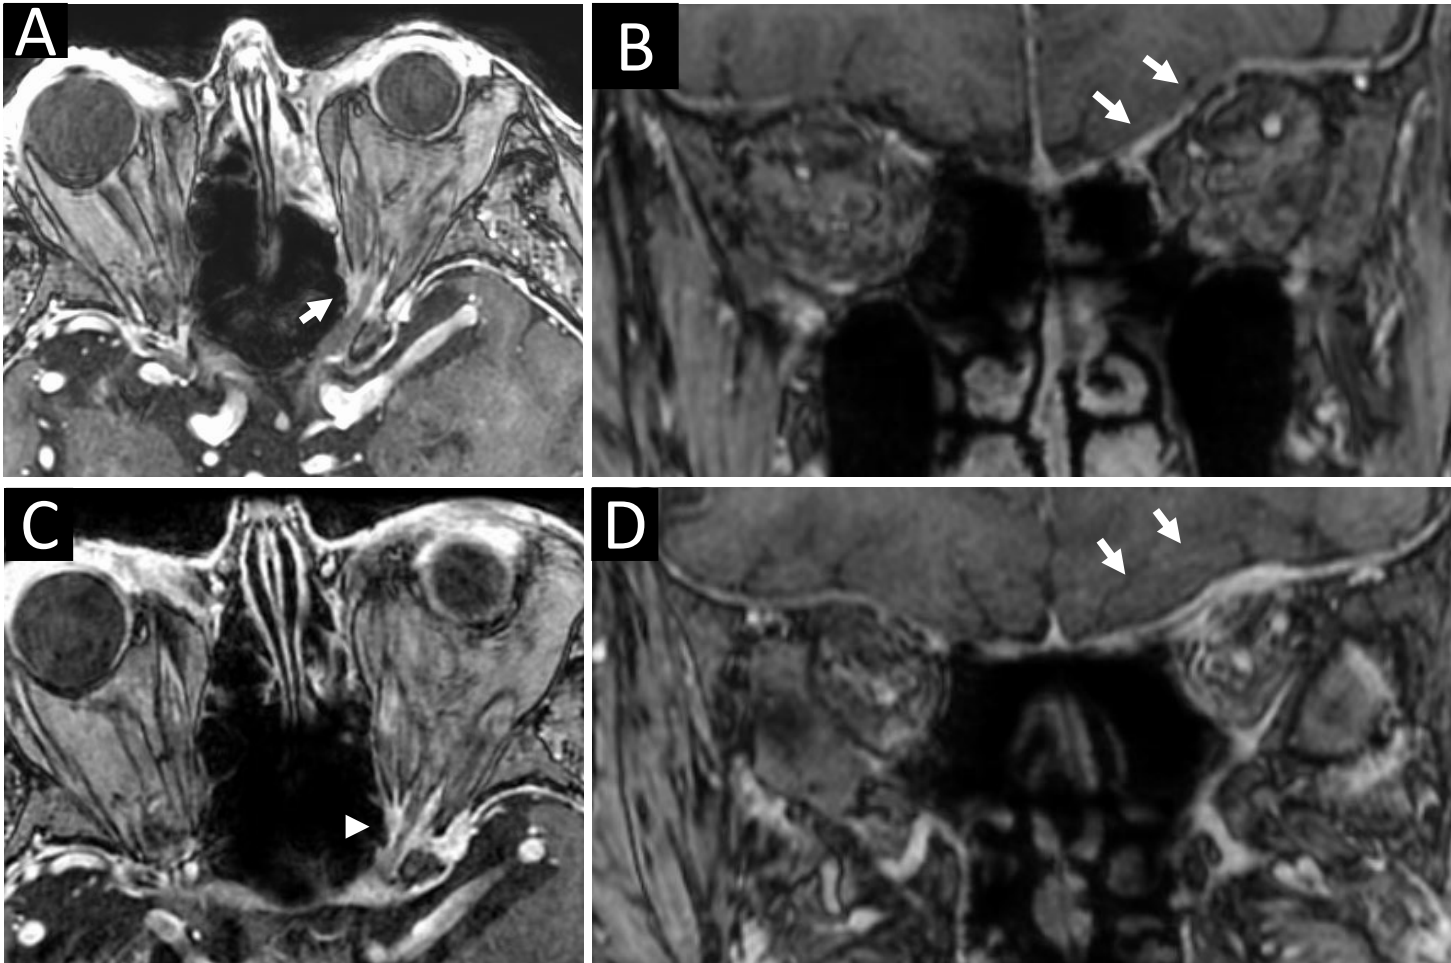

**Additional file 1: Figure.** Contrast-enhanced MRI images during remission and recurrence  
A, B: MRI images at the time of remission, taken 2 weeks after the start of treatment.  
C, D: MRI images taken for follow-up, one week before the patient realized his vision had deteriorated for the recurrence.

White arrows indicate enhanced dura of the bottom of left frontal cortex (B, D) . The enhancement in (D) appears thicker and stronger than that of in (B).

White arrow head points enhancement surrounding mildly enhanced the optic nerve (C).
